# Supplementary material for: Targeting RNA Polymerase I transcription synergises with TOP1 inhibition in potentiating the DNA damage response in high-grade serous ovarian cancer
Source: bioRxiv or medRxiv preprint supplement (doi:10.1101/849307), 2019-11-20

A

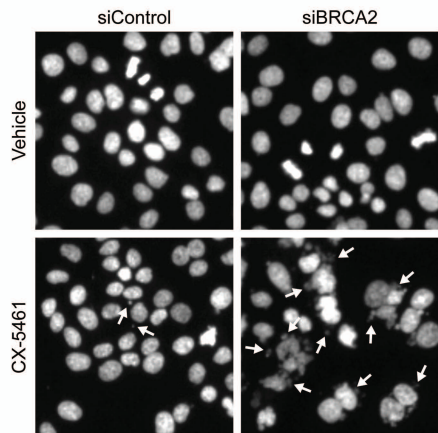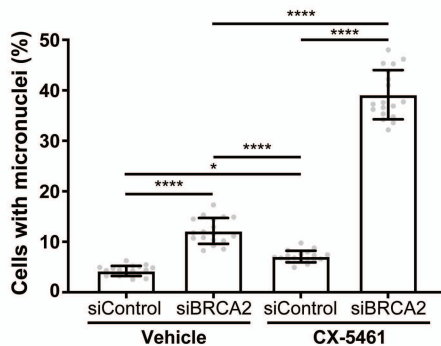

B

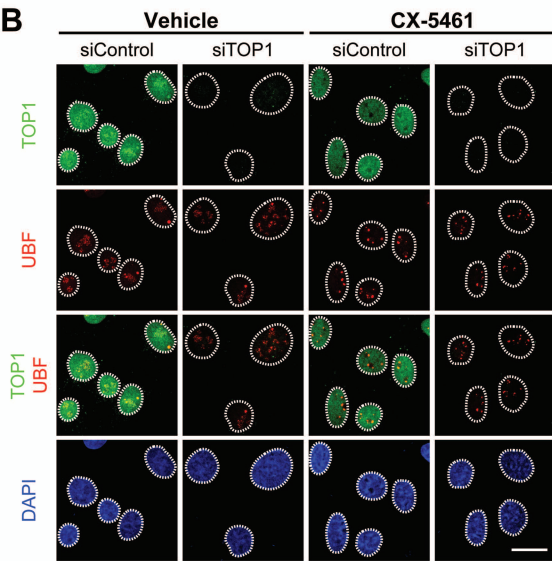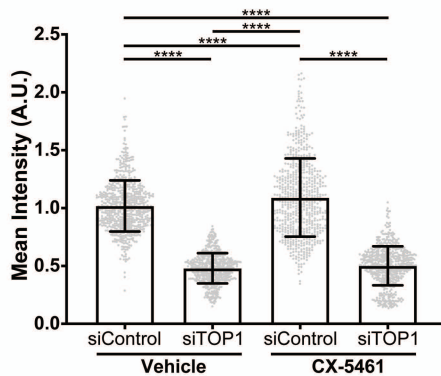

**A**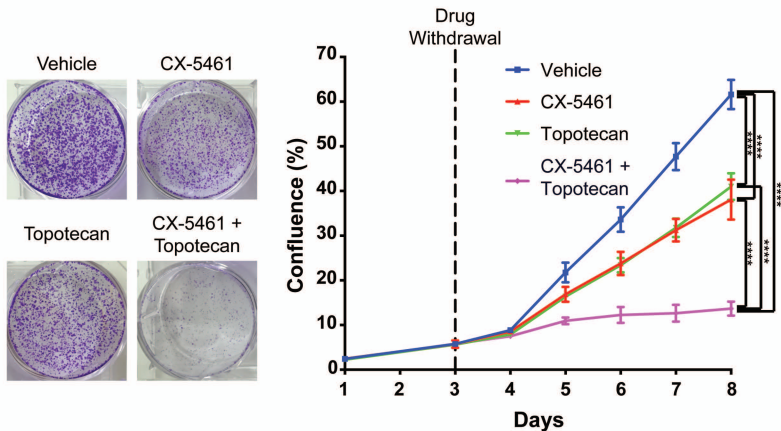**B**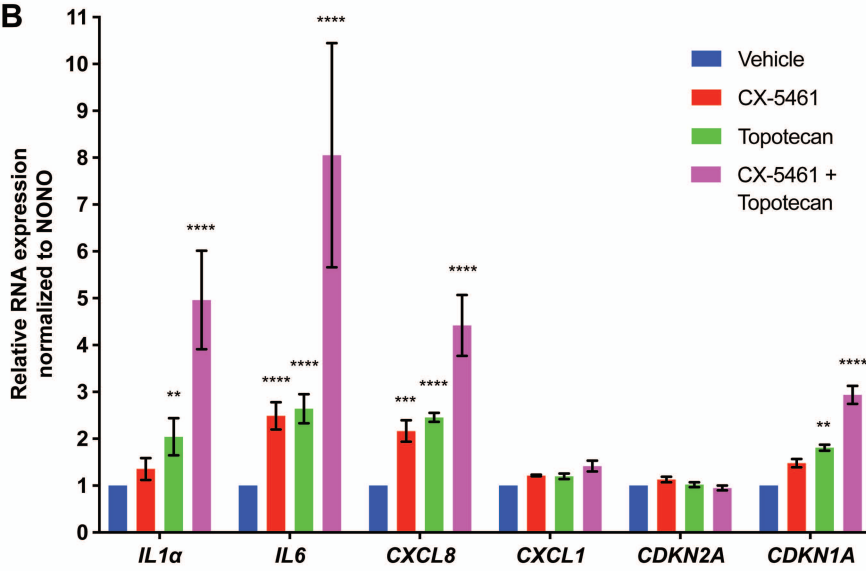

Supplement: Supplementary file [file media-2.pdf]
